# Supplementary material for: Synergistic integration of mixed metal phosphate and poly(1H-pyrrole) for high-performance asymmetric supercapacitor
Source: Royal Society of Chemistry journal article supplement (doi:10.1039/d6ra02421a), 2026-05-18
Supplement: d6ra02421a1.pdf [file d6ra02421a1.pdf]

## **Synergistic Integration of Mixed Metal Phosphate and Poly(1H-Pyrrole) for High-Performance Asymmetric Supercapacitor**

Malek Ali<sup>a</sup>, Junaid Khan<sup>b, c, \*\*</sup>, Sarah S. Albalawi<sup>d</sup>, M. Ahmed<sup>e</sup>, Asif Mahmood<sup>f, \*</sup>

<sup>a</sup>Aircraft Maintenance Department, Faculty of Aviation Sciences, Amman Arab University, Amman 11953, Jordan

<sup>b</sup>Department of Physics, Government Postgraduate College No.1, Abbottabad, Khyber Pakhtunkhwa, Pakistan

<sup>c</sup>Department of Higher Education, Archives and Libraries, Government of Khyber Pakhtunkhwa, Pakistan

<sup>d</sup>Department of Chemistry, College of Science, University of Jeddah, P.O. 80327, Jeddah 21589, Saudi Arabia

<sup>e</sup>University College, Korea University, 145 Anam-ro, Seongbuk-gu, Seoul, 02841, South Korea

<sup>f</sup>Department of Chemical Engineering, College of Engineering, King Saud University, Riyadh 11421, Saudi Arabia

\*\*Email: [junaidkhan.nanotech@gmail.com](mailto:junaidkhan.nanotech@gmail.com)

\* Email: [ahayat@ksu.edu.sa](mailto:ahayat@ksu.edu.sa)

Figure S1: EDX elemental mapping analysis of optimized composite MMP-PPY2.

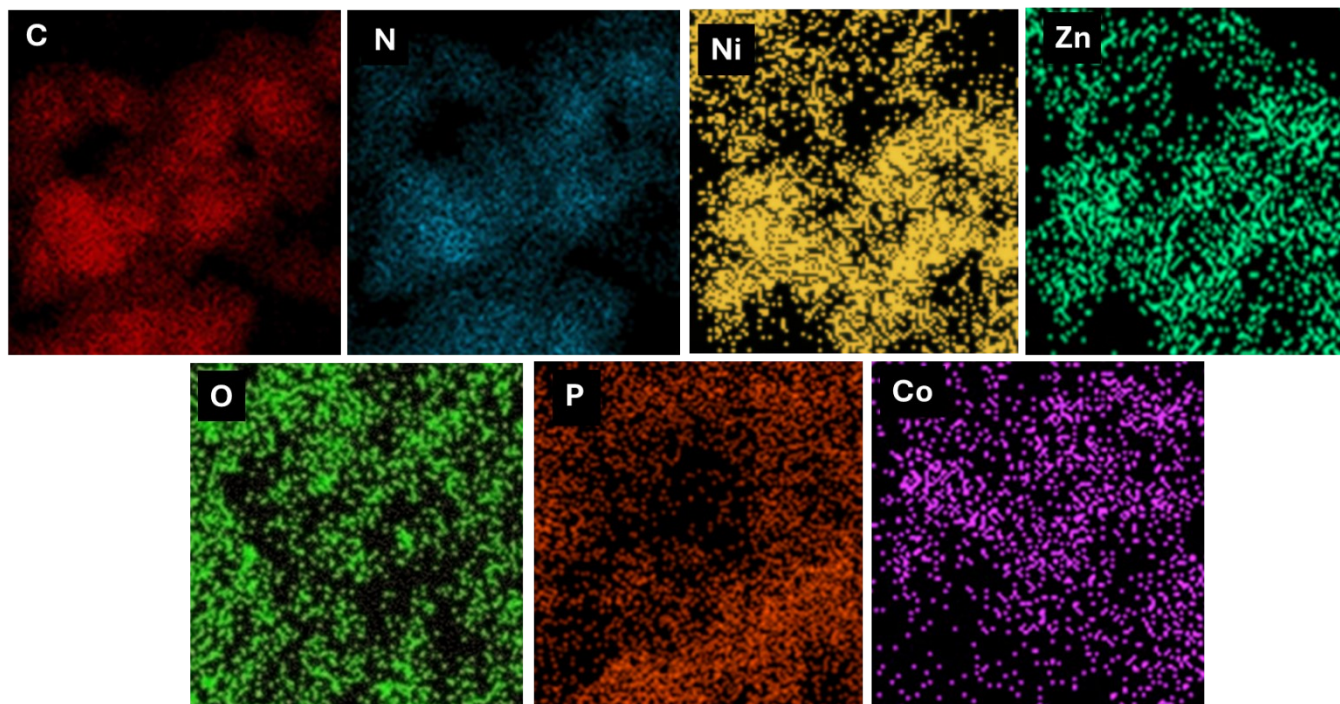

Figure S2: Raman spectra of (a) pure Zn-doped Ni–Co phosphate, (b–e) Zn-doped Ni–Co

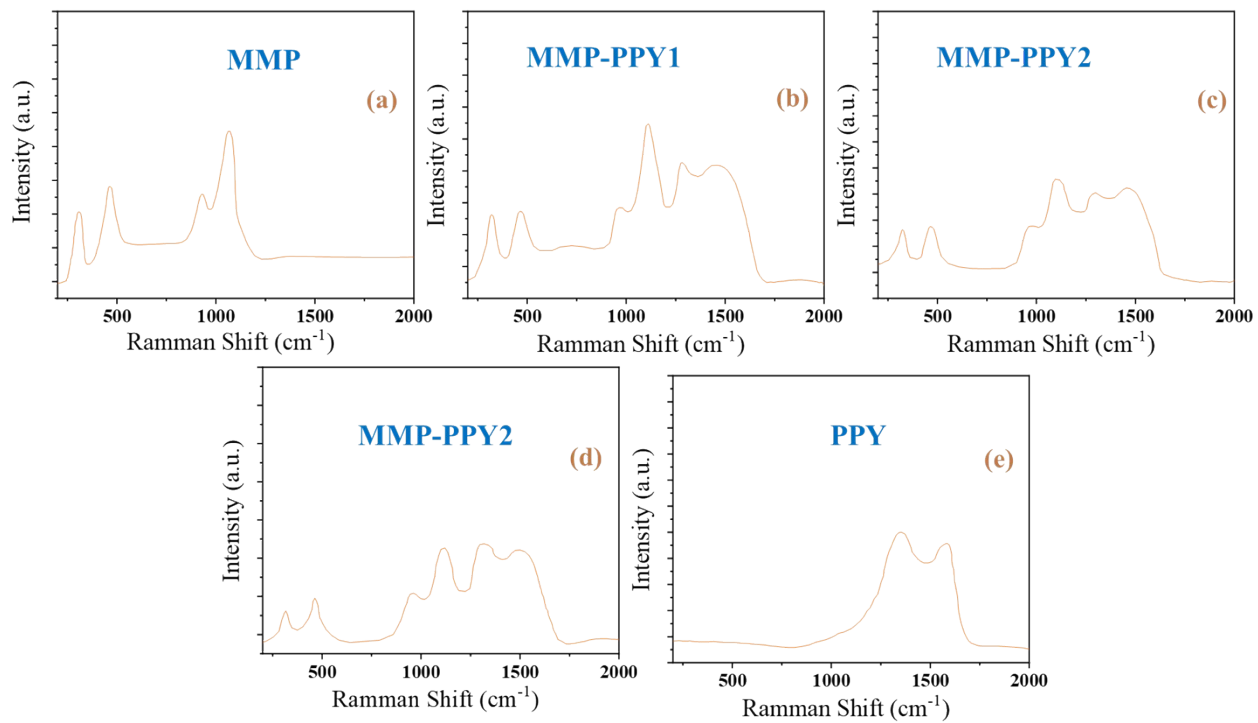

phosphate/polypyrrole (PPy) composites with increasing PPy content, and (f) PPy.

Figure S3: The XPS spectra of the Zn–NiCo(PO<sub>4</sub>)<sub>2</sub>/PPy composite (MMP-PPY2).

The P 2p spectrum shows a characteristic peak around ~133–134 eV corresponding to PO<sub>4</sub><sup>3-</sup> and P<sub>2</sub>O<sub>5</sub> species, while the N 1s spectrum exhibits peaks at ~398–402 eV attributed to different nitrogen states in polypyrrole, including neutral amine (=N–/–NH–) and positively charged nitrogen (N<sup>+</sup>). Notably, these binding energies remain nearly unchanged compared to the individual materials, indicating that the electronic environments of phosphorus and nitrogen are preserved. This absence of significant peak shifts or new components suggests that no chemical bonding or charge transfer occurs between Zn–Ni–Co(PO<sub>4</sub>)<sub>2</sub> and PPy.

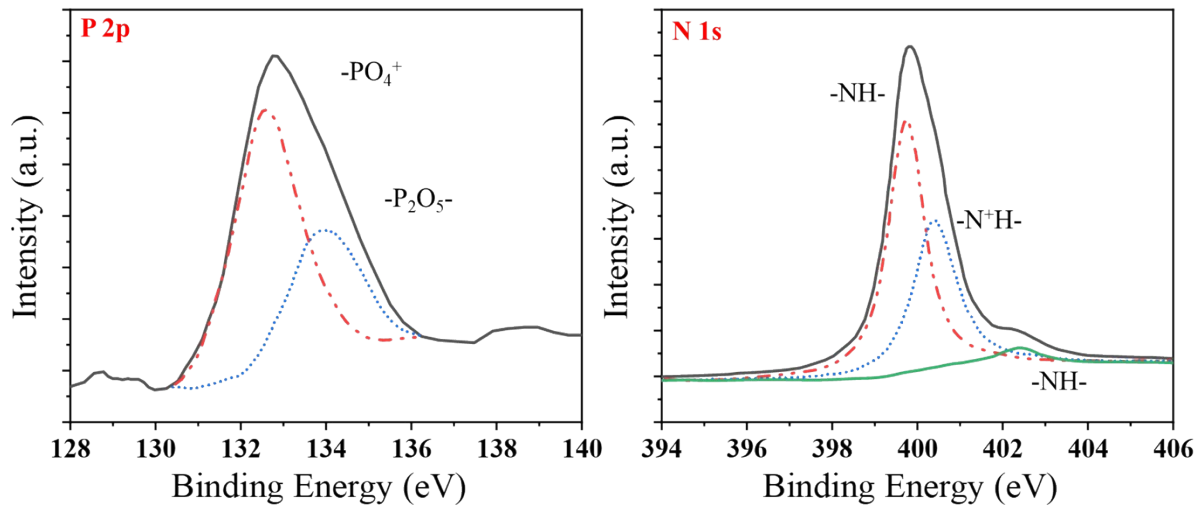

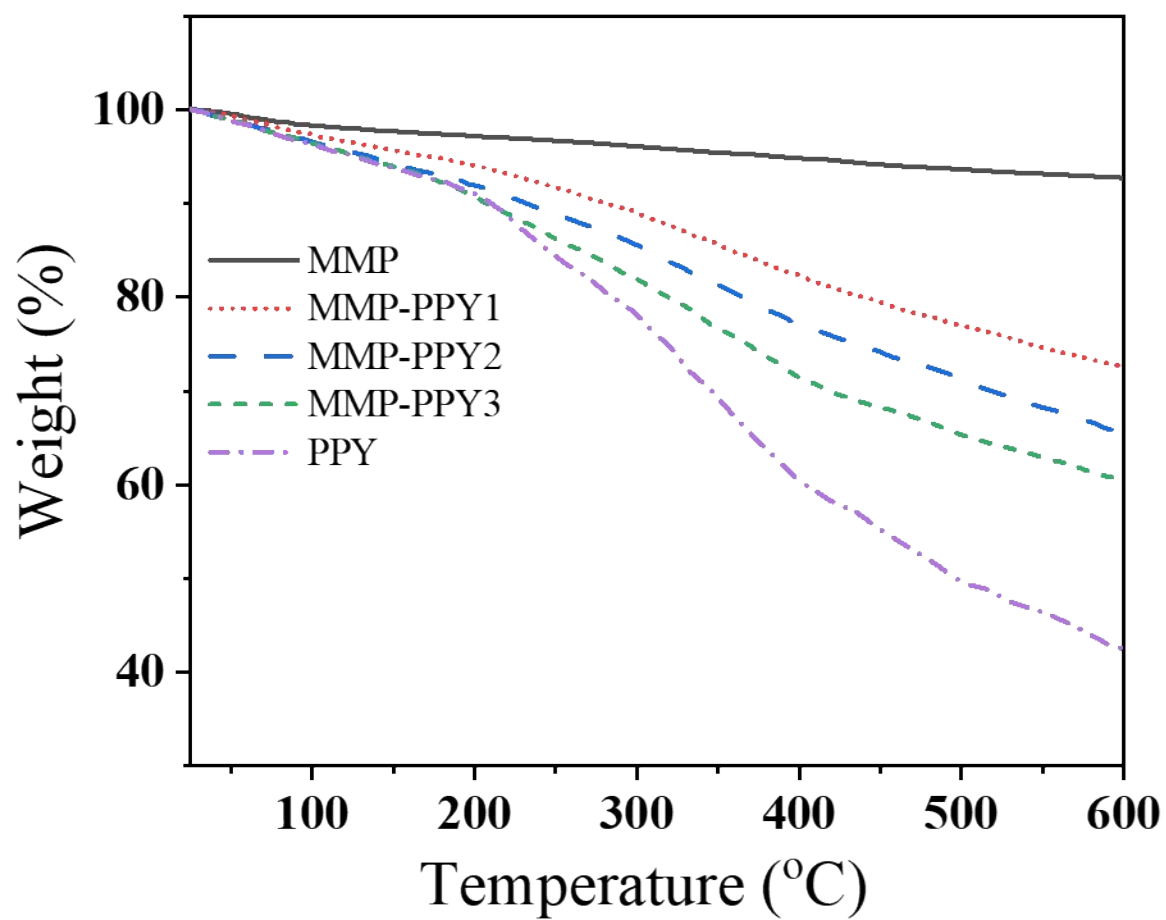

Figure S4: Thermogravimetric analysis (TGA) curves of all the samples.

Figure S5: CV curves at multiple scan rates for MMP-PPY1 and MMP-PPY2.

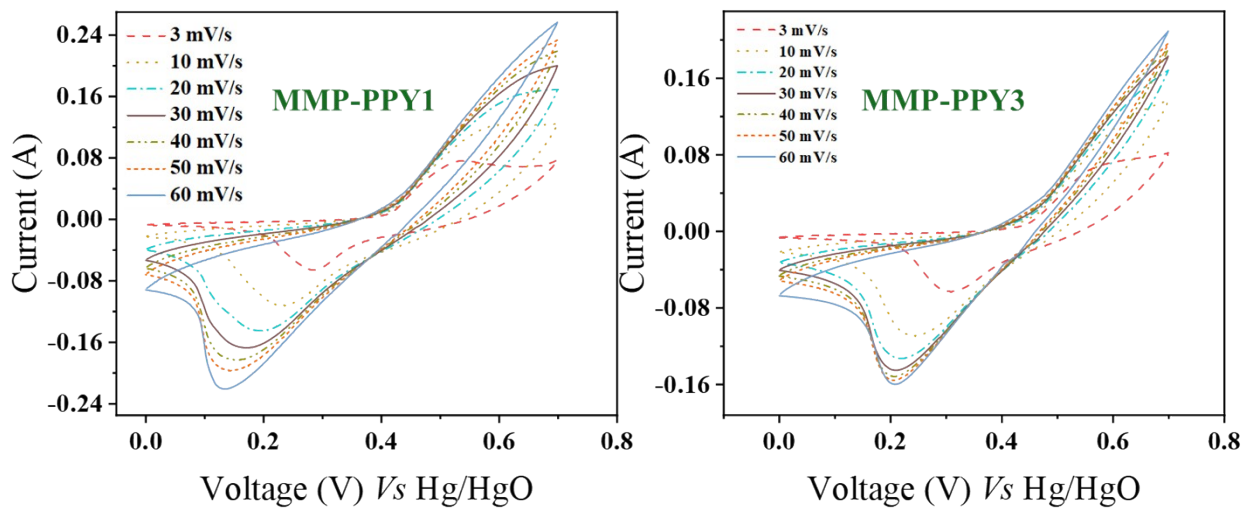

Figure S6: Columbic efficiency of all the samples at multiple scan rates.

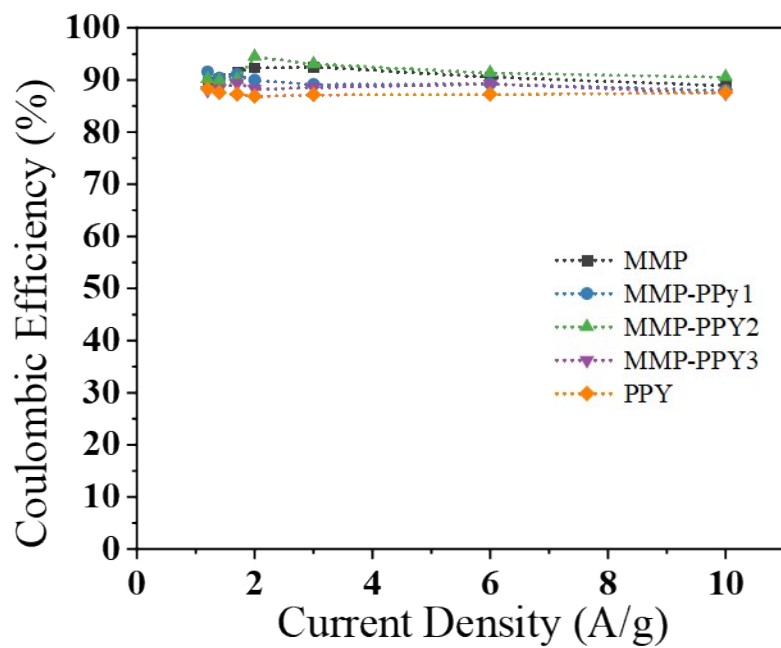

### Calculations Procedure:

To ensure the optimal performance and reliability of the optimized MMP-PPY2 composite material, the asymmetric supercapacitor device has been fabricated. The masses of the active materials for the positive (MMP-PPY2) and negative (activated carbon) electrodes were carefully balanced based on the principle of charge balance.

$$\frac{m_+}{m_-} = \frac{C_{s-} \times \Delta V_-}{Q_{s+}} \quad (S1)$$

In above equation,  $m_-$  and  $m_+$  signifies the active mass of the negative and positive electrode, respectively. Whereas  $C_{s-}$  and  $Q_{s+}$  depicts the specific capacitance and specific capacity of the negative and positive electrodes in a three-electrode setup. The corresponding PW of negative electrode is displayed by  $\Delta V_-$ . Through utilizing the aforementioned equation, the active mass of the negative and positive electrodes was obtained as 3.50 and 6.50 mg, respectively.

The specific capacity  $Q_s$  (C/g) is calculated using the standard formula

$$\text{(using CV results)} \quad Q_s = \frac{1}{mv} \int I(V) dV \quad (S2)$$

$$\text{(using GCD results)} \quad Q_s = \frac{I \times \Delta t}{m} \quad (S3)$$

The integral part represents the area under the CV curve; m is the total mass of active material in both electrodes (positive + negative) in grams  $v$  is the scan rate and  $\Delta t$  is the discharge time in seconds.

**Table S1: Calculation of  $Q_s$  via CV outcomes.**

| <b>Sample</b>        | <b>Active<br/>Mass of<br/>Electrode<br/>Material<br/>(g)</b> | <b>Area<br/>Under<br/>CV<br/>Curve<br/>(3 mV/s)</b> | <b>Area<br/>Under<br/>CV<br/>Curve<br/>(5 mV/s)</b> | <b>Area<br/>Under<br/>CV<br/>Curve<br/>(10<br/>mV/s)</b> | <b>Area<br/>Under<br/>CV<br/>Curve<br/>(20<br/>mV/s)</b> | <b>Area<br/>Under<br/>CV<br/>Curve<br/>(30<br/>mV/s)</b> | <b>Area<br/>Under<br/>CV<br/>Curve<br/>(40<br/>mV/s)</b> | <b>Area<br/>Under<br/>CV<br/>Curve<br/>(50<br/>mV/s)</b> |
|----------------------|--------------------------------------------------------------|-----------------------------------------------------|-----------------------------------------------------|----------------------------------------------------------|----------------------------------------------------------|----------------------------------------------------------|----------------------------------------------------------|----------------------------------------------------------|
| <b>MMP</b>           | <b>0.004</b>                                                 | 0.01428                                             | 0.021452                                            | 0.034126                                                 | 0.048557                                                 | 0.056007                                                 | 0.062669                                                 | 0.070119                                                 |
| <b>MMP-<br/>PPY1</b> | <b>0.004</b>                                                 | 0.018544                                            | 0.028495                                            | 0.046857                                                 | 0.069351                                                 | 0.081161                                                 | 0.091038                                                 | 0.102705                                                 |
| <b>MMP-<br/>PPY2</b> | <b>0.004</b>                                                 | 0.021461                                            | 0.028146                                            | 0.037216                                                 | 0.044641                                                 | 0.038302                                                 | 0.037469                                                 | 0.037609                                                 |
| <b>MMP-<br/>PPY3</b> | <b>0.004</b>                                                 | 0.024762                                            | 0.034041                                            | 0.052207                                                 | 0.080041                                                 | 0.094024                                                 | 0.105969                                                 | 0.111375                                                 |
| <b>PPY</b>           | <b>0.004</b>                                                 | 0.010695                                            | 0.016045                                            | 0.02634                                                  | 0.039518                                                 | 0.045219                                                 | 0.045542                                                 | 0.042207                                                 |

**Table S2: Calculation electrochemical outcomes for real device.**

| Current density | Discharge time (s) | Current | Specific | energy | Power |
|-----------------|--------------------|---------|----------|--------|-------|
|-----------------|--------------------|---------|----------|--------|-------|

| (A g <sup>-1</sup> ) |       | (A)   | capacity (C g <sup>-1</sup> ) | density<br>(Wh Kg <sup>-1</sup> ) | density<br>(W kg <sup>-1</sup> ) |
|----------------------|-------|-------|-------------------------------|-----------------------------------|----------------------------------|
| 1.9                  | 233.7 | 0.019 | 444.0                         | 104.9                             | 1615                             |
| 2.2                  | 183.7 | 0.022 | 404.1                         | 95.4                              | 1870                             |
| 2.5                  | 149.6 | 0.025 | 374.0                         | 88.3                              | 2125                             |
| 3                    | 113   | 0.030 | 339.0                         | 80                                | 2550                             |
| 4                    | 76.6  | 0.040 | 306.4                         | 72.3                              | 3400                             |
| 6                    | 45.4  | 0.060 | 272.4                         | 64.4                              | 5100                             |
| 8                    | 30.8  | 0.080 | 246.4                         | 58.2                              | 6800                             |
| 11                   | 20    | 0.110 | 220.0                         | 51.9                              | 9350                             |
| 14                   | 14.6  | 0.140 | 204.4                         | 48.4                              | 11900                            |

**Table S3: EIS Fitting parameters.**

| Sample                | Rs (Ω) | Rct (Ω) | CPE n | Warburg σ (Ω·s <sup>-1/2</sup> ) |
|-----------------------|--------|---------|-------|----------------------------------|
| <b>MMP</b>            | 1.35   | 4.00    | 0.87  | 1.8                              |
| <b>MMP-PPy1 (15%)</b> | 1.04   | 2.20    | 0.88  | 1.0                              |
| <b>MMP-PPy2 (25%)</b> | 1.08   | 0.88    | 0.92  | 0.40                             |
| <b>MMP-PPy3 (35%)</b> | 1.40   | 6.00    | 0.82  | 2.5                              |
